# Supplementary material for: Epidemiology and Clinical Features of Heart Failure with Preserved Ejection Fraction
Source: PubMed Central journal article supplement — Card Fail Rev. 2022 Aug 4;8:e27. doi: 10.15420/cfr.2022.06 (PMC9379774; doi:10.15420/cfr.2022.06), 2022-08-04
Supplement: cfr-08-e27-Supp.pdf [file cfr-08-e27-Supp.pdf]

Supplementary Table 1: Studies of Clustering Analysis of Patients with HFpEF

| Authors                                                     | Data source                                             | Study outcomes                                                      | Phenotypic approach                                      | Number of features included                                                                                                    | Number of clusters | Characteristics of each phenotype (proportion of patients out of studied patients, %)                                                                                                                                                                                                                                                                                                                                                                                                                                                                                                                                                                                                                                                                                                                                                                                                     |
|-------------------------------------------------------------|---------------------------------------------------------|---------------------------------------------------------------------|----------------------------------------------------------|--------------------------------------------------------------------------------------------------------------------------------|--------------------|-------------------------------------------------------------------------------------------------------------------------------------------------------------------------------------------------------------------------------------------------------------------------------------------------------------------------------------------------------------------------------------------------------------------------------------------------------------------------------------------------------------------------------------------------------------------------------------------------------------------------------------------------------------------------------------------------------------------------------------------------------------------------------------------------------------------------------------------------------------------------------------------|
| Shah et al. <b>Error! Bookmark not defined.</b> (2015)      | 397 patients from Northwestern University HFpEF program | CV and non-CV hospitalisation                                       | Hierarchical clustering                                  | 67 (Demographic, echocardiographic parameters, invasive haemodynamic assessments)<br>*No comorbidities included                | 3                  | <ol style="list-style-type: none"> <li>1. <b>Younger</b>, lower BNP, <b>least myocardial remodeling</b> and dysfunction (32%)</li> <li>2. Highest prevalence of <b>obesity</b>, <b>DM</b>, obstructive sleep apnoea, highest PCWP and PVR (30%)</li> <li>3. <b>Oldest</b>, high prevalence of <b>AF</b>, <b>CKD</b>, high BNP, high MAGGIC score, longest QRS duration, highest LVMI, worst <b>RV function</b>, worst outcome (38%)</li> </ol> <p><u>*Cluster 3 had the highest HR of 1.7 (95% CI 0.6-4.9) versus Group 1 for all-cause death</u><br/>HF duration was similar across phenotypes</p>                                                                                                                                                                                                                                                                                       |
| Kao et al. <b>Error! Bookmark not defined.</b> (2015)       | 4,113 patients from I-PRESERVE                          | All-cause mortality or CV hospitalisation                           | Latent class analysis                                    | 11 (Age, gender, BMI, AF, CAD, DM, hyperlipidaemia, valvular disease, alcohol use, eGFR, haematocrit)                          | 6                  | <ol style="list-style-type: none"> <li>1. 100% <b>men</b>, <b>younger</b>, more alcohol use, low rates of AF, renal disease, valvular disease (15%)</li> <li>2. Predominantly women, <b>younger</b>, more anaemia, low rates of AF, renal disease, valvular disease (17%)</li> <li>3. High rates of obesity, DM, hyperlipidaemia, CAD, anaemia, <b>worse renal function</b> (8%)</li> <li>4. 100% women, average rates of <b>DM</b>, hyperlipidaemia, <b>obesity</b>, renal insufficiency (30%)</li> <li>5. 100% <b>men</b>, lower BMI, excess <b>AF</b> and <b>CAD</b> (18%)</li> <li>6. Predominantly <b>women advanced age</b>, <b>lower BMI</b>, higher rates of <b>AF</b>, valvular disease, renal dysfunction, anaemia, worst outcome (12%)</li> </ol> <p><u>*Cluster 6 had the highest HR of 3.1 (95% CI 2.4-4.0) versus Group 1 for all-cause death or CV hospitalisation</u></p> |
| Segar et al. <b>Error! Bookmark not defined.</b> (Oct 2019) | 654 patients from TOPCAT<br><br>Outcome;                | Composite of aborted cardiac arrest, HF hospitalisation or CV death | Penalized finite mixture model-based clustering analysis | 61 (Demographics, clinical variables, laboratory data, electrocardiographic characteristics, and echocardiographic parameters) | 3                  | <ol style="list-style-type: none"> <li>1. <b>Higher BMI</b>, severe HF symptoms, higher NP, highest prevalence of <b>DM</b>, dyslipidaemia, and atherosclerotic CV disease, worst abnormalities in LV and LA structure and function, worst outcome (21%)</li> <li>2. <b>lowest DM</b>, <b>mild HF symptoms</b>, <b>lower CV disease</b>, higher burden of diastolic dysfunction (17%)</li> <li>3. lowest BMI, intermediate burden of atherosclerotic vascular disease, DM, lowest NP level, most favourable diastolic function profile (63%)</li> </ol> <p><u>*Cluster 1 had the highest HR of 1.9 (95%CI 1.4-2.7) versus Group 3 for the composite of aborted cardiac arrest, HF hospitalisation or CV death</u></p>                                                                                                                                                                     |
| Hedman, et al. <b>Error!</b>                                | 320 patients from KaRen study                           | Composite of all-cause mortality and                                | Model-based clustering                                   | 32 echo variables                                                                                                              | 6                  | <ol style="list-style-type: none"> <li>1. <b>Younger</b>, risk factors such as HTN, CAD, <b>DM</b>, larger LV volumes and CKD (9%)</li> <li>2. <b>Older</b>, less hypertrophy but <b>worse LV and RV systolic function</b> and more severe HF, and notably high prevalence of <b>COPD</b>, worst outcome (13%)</li> </ol>                                                                                                                                                                                                                                                                                                                                                                                                                                                                                                                                                                 |

|                                                                    |                                     |                                                                      |                         |                                                                                                                          |   |                                                                                                                                                                                                                                                                                                                                                                                                                                                                                                                                                                                                                                                                                                                                                                                                                                                                                        |
|--------------------------------------------------------------------|-------------------------------------|----------------------------------------------------------------------|-------------------------|--------------------------------------------------------------------------------------------------------------------------|---|----------------------------------------------------------------------------------------------------------------------------------------------------------------------------------------------------------------------------------------------------------------------------------------------------------------------------------------------------------------------------------------------------------------------------------------------------------------------------------------------------------------------------------------------------------------------------------------------------------------------------------------------------------------------------------------------------------------------------------------------------------------------------------------------------------------------------------------------------------------------------------------|
| <b>Bookmark not defined.</b><br>(Jan 2020)                         |                                     | HF hospitalisation                                                   |                         | 11 laboratory and routine clinical variables                                                                             |   | <p>3. <b>Younger, male</b>, obesity, less left and right diastolic and systolic function, and <b>milder HF</b> (15%)</p> <p>4. <b>Male</b>, hypertension, LV hypertrophy, LA enlargement and <b>AF</b> (16%)</p> <p>5. Older, female, HTN, CAD, large left side but good RV function (32%)</p> <p>6. <b>Older, female, low BMI</b>, hypertension, <b>AF</b> and right-sided failure (15%)</p> <p>*Cluster 2 had the highest HR of 5.73 (95% CI 2.57 to 12.77) versus Group 3 for <u>Composite of all-cause mortality or HFH (13%)</u></p>                                                                                                                                                                                                                                                                                                                                              |
| Cohen et al. <b>Error! Bookmark not defined.</b><br>(March 2020)   | 3442 patients from TOPCAT           | Composite of CV death, HF hospitalisation, or aborted cardiac arrest | Latent class analysis   | 8 (Age, sex, race, DM, AF, obesity, NYHA class CKD)                                                                      | 3 | <p>1. <b>Younger</b>, smoking, <b>preserved functional class</b>, highest smoking rate, preserved renal function, low DM, least evidence of LV hypertrophy and arterial stiffness, lowest NT-proBNP (35%)</p> <p>2. <b>Older, high prevalence of AF and CKD</b>, low DM and obesity, small concentric LV with lowest LV mass, largest LA enlargement, large-artery stiffening, biomarkers of innate immunity and vascular calcification (IL-8, pentraxin-3, soluble intercellular adhesion molecule-1) (39%)</p> <p>3. <b>Very high prevalence of obesity and DM</b>, high prevalence of CKD and depression, impaired functional class, concentric LV hypertrophy, high TNF-alpha, liver fibrosis, tissue remodeling, worst outcome (26%)</p> <p>*Cluster 3 had the highest HR of 3.4 (95%CI 2.8-4.2) versus Group 1 for <u>composite of CV death, HFH, aborted cardiac arrest</u></p> |
| Schrub et al. <b>Error! Bookmark not defined.</b><br>(May 2020)    | 356 patients from KaRen study       | Composite of all-cause mortality or first hospitalisation for HF     | Hierarchical clustering | 55 (Demographic, comorbidities, echocardiographic parameters of left and right-side heart including strain measurements) | 3 | <p>1. Younger male, highest rate of HTN, <b>DM, obesity</b> and renal insufficiency (36%)</p> <p>2. Female dominant, lowest rates of DM, less sinus rhythm, preserved renal function, subnormal LV function (38%)</p> <p>3. <b>Oldest, female prevalent, highest rate of rhythm disorder</b>, highest incidence of MR and atrial remodeling (26%)</p> <p>*No statistical difference in all-cause death or HF hospitalisation</p>                                                                                                                                                                                                                                                                                                                                                                                                                                                       |
| Woolley et al. <b>Error! Bookmark not defined.</b><br>(March 2021) | 429 patients from BIOSTAT-CHF       | Occurrence of death or HF hospitalisation                            | Hierarchical clustering | 363 biomarkers                                                                                                           | 4 | <p>1. Highest prevalence of <b>DM</b>, and renal disease, activation of inflammatory pathways (14%)</p> <p>2. <b>Oldest</b> and frequent <b>age-related comorbidities</b> (38%)</p> <p>3. <b>Youngest</b>, highest prevalence of <b>obesity, least symptoms</b>, lowest NT-proBNP (39%)</p> <p>4. Highest prevalence of <b>COPD</b>, ischaemic aetiology, smoking, <b>more symptom</b>, highest NT-proBNP and troponin (10%)</p> <p>*Occurrence of death or HFH was highest in Group 1 (62.1%) and 4 (62.8%) and lowest in Group 3 (25.6%)</p>                                                                                                                                                                                                                                                                                                                                         |
| Uijl et al. <b>Error! Bookmark not defined.</b>                    | 6909 patients from SwedeHF registry | Composite of CV mortality and HF hospitalisation                     | Latent class analysis   | 10 (Age, sex, NYHA class, classified BMI, classified eGFR, AF, COPD, DM, HTN, IHD)                                       | 5 | <p>1. <b>Young, low comorbidity burden</b>, highest implantable device (10%)</p> <p>2. <b>AF, HTN, without DM</b> (30%)</p> <p>3. <b>Oldest</b>, high prevalence of <b>AF</b> (25%)</p> <p>4. High prevalence of <b>obesity, DM</b> and HTN (15%)</p>                                                                                                                                                                                                                                                                                                                                                                                                                                                                                                                                                                                                                                  |

|            |  |  |  |  |  |                                                                                                                                                                                                                                    |
|------------|--|--|--|--|--|------------------------------------------------------------------------------------------------------------------------------------------------------------------------------------------------------------------------------------|
| (May 2021) |  |  |  |  |  | 5. <b>Older</b> , high prevalence of <b>AF</b> , <b>HTN</b> , <b>low eGFR</b> , frequent diuretic prescription (20%)<br>*Cluster 5 had the highest HR of 4.7 (95%CI 3.4-6.4) versus Group1 for composite of all-cause death or HFH |
|------------|--|--|--|--|--|------------------------------------------------------------------------------------------------------------------------------------------------------------------------------------------------------------------------------------|

\*Features used to further classify into five common phenotypes (*Figure 1*) are bolded.

Abbreviations: AF = atrial fibrillation; BIOSTAT-CHF = Biology Study to Tailored Treatment in Chronic Heart Failure; BMI = body mass index; BNP = brain natriuretic peptide; CAD = coronary artery disease; CI = confidence interval; CKD = chronic kidney disease; CV = cardiovascular; DM = diabetes mellitus; HFH = heart failure hospitalisation; eGFR = estimated glomerular filtration rate; HFpEF = heart failure with preserved ejection fraction; HTN = hypertension; HR = hazard ratio; IHD = ischaemic heart disease; IL = interleukin; I-PRESERVE = Irbesartan in Heart Failure with Preserved Ejection Fraction Study; KaRen, Karolinska-Rennes; LA = left atrial; LV = left ventricular; LVMI = left ventricle mass index; MAGGIC = Meta-Analysis Global Group in Chronic Heart Failure; MR = mitral regurgitation; NT-proBNP = N-terminal pro brain natriuretic peptide; NP = natriuretic peptide; NYHA = New York Heart Association classification; PCWP = pulmonary capillary wedge pressure; PMI = pacemaker implantation; PVR = pulmonary vascular resistance; RV = right ventricle; SBP = systolic blood pressure; SwedeHF = Swedish Heart Failure Registry; TNF = tumour necrosis factor; TOPCAT = Treatment of Preserved Cardiac Function Heart Failure with an Aldosterone Antagonist.
